# Supplementary material for: Talking Mental Health in home care services for older people: implementation and process evaluation
Source: Research Square preprint supplement (doi:10.21203/rs.3.rs-6730629/v1), 2025-07-04
Supplement: Supplementary file 1 [file 37b5dcff4761d305c378e8fa.docx]

Supplementary File 3. Coding tree

TMH Focus groups and Interviews code book based on CFIR

| Name | Description |
| --- | --- |
| Characteristics of individuals | CFIR domain related to the staff who were implementing the intervention |
| Identification with the organisation | CFIR construct related to staff alignment with UA and local office values and purpose |
| Individual stage of change | CFIR construct related to stages of engagement with the change |
| Knowledge and beliefs about mental health needs | CFIR construct about impact of staff understanding or beliefs on implementation |
| Other personal attributes barriers and facilitators | CFIR construct related to staff attributes that may facilitate or hinder implementation such as experience, language, education, stress etc |
| Self-efficacy | CFIR construct related to staff perceptions of their ability and confidence in implementing the TMH process |
| Inner setting | CFIR domain of the setting for implementing TMH |
| Communication about TMH and other processes | CFIR construct of communication processes related to implementation |
| Culture of UA Local office | CFIR construct on workplace culture |
| Implementation climate | CFIR construct to describe learning climate, compatibility of TMH, goals and feedback, priority and incentives |
| Compatibility with work processes | new processes added to existing processes and ease of adaptation |
| Goals and feedback | communicated, understood, opportunities to have a say and get feedback |
| Incentives | for staff in implementing the TMH processes |
| Learning climate | facilitating or barrier |
| Priority | importance of TMH in work routines |
| Readiness | how ready were leaders, resources, access to info and knowledge by staff |
| Structure of home care services | CFIR construct influence of structure on implementation |
| Intervention Characteristics | CFIR domain about quality of evidence |
| Adaptability | constructs of intervention |
| Complexity | CFIR construct of intervention |
| Cost | CFIR Construct |
| Design | CFIR construct |
| Evidence source | CFIR domain about needs, policy changes and partners |
| Outer Setting | CFIR domain policy, needs, partners |
| Aged care policy changes | CFIR construct influence of policy and funding changes |
| Older people's needs | CFIR construct staff perceived need |
| Partners | CFIR construct perceived influence of external partners |
| Process of Implementation | CFIR domain related to how the TMH intervention was implemented |
| Engaging | CFIR construct related to those who were engaged |
| Champions | any champions who were engaged |
| External experts | who were engaged |
| Leaders and staff | who were engaged in the implementation |
| How well it was rolled out | CFIR construct related to execution of the implementation process |
| Planning | CFIR construct related to amount of planning known about or engaged in by staff |
| Reflecting and evaluation | CFIR construct related to how staff were able to reflect on the process and give feedback or evaluate the process |
