# Supplementary material for: Talking Mental Health in home care services for older people: implementation and process evaluation
Source: Research Square preprint supplement (doi:10.21203/rs.3.rs-6730629/v1), 2025-07-04
Supplement: Supplementary file 2 [file 4f81a536135ee9aafd2e27b6.docx]

**Supplementary File 4.**

**Focus Group questions:** Adapted from CFIR <https://cfirguide.org/> 2022 and Best et al. 2022(1)

**Preamble: what we want to focus on is the project implementation process and how it can be maintained** (Looking at how acceptable **and feasible the Talking Mental Health project has been from your perspective)**

**!.What has been Your experience of TMH?:**

Before the project began, did you feel that more could be done to support the mental health of your clients?

How well does the TMH process support your clients? Any examples?

Did the different aspects of the project, for example, the training and the changes to Procura make sense to you?

How does the project fit in with your personal beliefs and values?

And the values of the organisation?

How well did it fit in with your priorities in caring for clients?

How likely are you to continue using these processes in your current work?

**2. The tools and processes in TMH**

How well did the new processes fit in with the other aspects of your job?

How complicated was it to use?

How was the look and feel of the tools developed in the project?

How well planned was the implementation?

Did you have the opportunity to be involved in the planning?

Are changes needed to the new processes?

**3. The organisational aspects:**

How well were the new processes and expectations communicated to staff?

Did you feel like you understood the goals of the project?

How well did the project fit with the way things are done in UA?

Did you feel like you had the tools and support that you needed to make the project work?

How were the project leaders involved, and could the leadership have been improved?

**4. Any other comments about the process, any barriers, what helped make it possible for you to use.**

1. Best S, Brown H, Lunke S, Patel C, Pinner J, Barnett CP, et al. Learning from scaling up ultra-rapid genomic testing for critically ill children to a national level. npj Genomic Medicine. 2021;6(1).
