# Supplementary material for: Talking Mental Health in home care services for older people: implementation and process evaluation
Source: Research Square preprint supplement (doi:10.21203/rs.3.rs-6730629/v1), 2025-07-04
Supplement: Supplementary file 4 [file 837fab3d510164b8a864ffd5.docx]

Supplementary File 1. Survey questions

Talking Mental Health baseline and end point Survey of Knowledge, Skills, and Confidence

| Please complete this short, anonymous survey for the Talking Mental Health project evaluation. Your responses are confidential and will not be provided to Uniting AgeWell management (your responses will go directly to the research team). Completion of this survey is voluntary and by submitting the responses, you are consenting to be part of this research project. You are free to withdraw at any time by closing your web browser. Please indicate how much you agree or disagree with the following statements | | | | | |
| --- | --- | --- | --- | --- | --- |
| Question | Responses | | | | |
| Q 1. Mental health problems are a normal part of getting older | 1.Strongly disagree | 2.Somewhat disagree | 3.Neither agree nor disagree | 4.Somewhat agree | 5. Strongly agree |
| Q 2. It is best not to talk with people about issues related to mental health, as they might get upset. |  |  |  |  |  |
| Q 3. I have a good understanding of what can cause mental health problems |  |  |  |  |  |
| Q 4. Providing the right support can help a person to recover from mental health problems |  |  |  |  |  |
| Q 5. I am confident about what I could do if I was worried about the mental health of a client |  |  |  |  |  |
| Q 6. I would share my concerns and seek help from colleagues if I was worried about a client's mental |  |  |  |  |  |
| Q 7. I practice self-care regularly (e.g., taking time out, going for a walk, exercise, seeking help to resolve a problem) |  |  |  |  |  |
| Q 8. My skills in supporting the well-being of older people have improved |  |  |  |  |  |
| Q 9. What was something new you learned during the Talking Mental Health project | Causes of mental health concerns for older people (1) | Skills in discussing mental health concerns with older people (2 | Self-Care (3) | Other (4) | comment |
| Q 10. How confident do you feel now compared to the beginning of the project to talk about mental health with your clients? | Less confident (1) | About the same (2) | More confident (3) |  |  |
| Q11. What is your date of birth? | Day Month Year | | | | |
| Q 12. What is your role with Uniting AgeWell? | Home Care Worker (1) | Care Organiser (2 | Care Advisor (3) | Other (4) |  |
| Q 13. What language/s do you mainly speak home | Free text | | | | |
| Q14 If you have any questions about the research, please contact tim.windsor@flinders.edu.au. If completing this survey raised any concerns for you, you may wish to contact Beyond Blue (1300 22 4636) or Lifeline (13 11 14). This research project has been approved by the Flinders University Human Research Ethics Committee in South Australia (Project ID: 6135). For any queries regarding the ethics approval of this project, please contact the Executive Officer of the committee via telephone on +61 8 8201 2543 or email human.researchethics@flinders.edu.au.  By moving to the next page, you will be submitting your responses and consent to be part of this research. | | | | | |
| Adapted from Mental Health Literacy measures (1, 2) | | | | | |

TMH mid-point feedback survey- HCW

| **We want to know how the new client phone report is working for you.  Your answers will help us improve the tool.** | | | |
| --- | --- | --- | --- |
| Q1. Is the new question 'how did your client seem today?' useful? | Yes | No | Not used yet |
| Q2. We want to remove the 'what did you notice?' question (and the responses about grief/loss/appearance etc).  Do you think this would make it easier to use? | Yes | No | Not used yet |
| Q3. We want to remove the 'Urgent/crisis' in the 'How did your client seem today?' question, because a worker would already call the office in an urgent situation. What do you think? | It is not needed | It is needed, keep it | other |
| Q 4.We want to remove 'Urgent: please call the office now', because a worker would already call the office in an urgent situation.  What do you think? | It is not needed | It is needed, keep it | other |
| Q5 We want to remove the 'Emergency please call 000', because a worker would already call 000 in an emergency.  What do you think? | It is not needed | It is needed, keep it | other |
| Q6  Is it useful to be able to add 'more information' ? | Yes | No | Not used yet |
| Q7 Is the new 'mental health and wellbeing' section in the task list information useful? | Yes | No | other |
| Q8 How long does it take to complete the new questions? | 1-2 minutes | 3-5 minutes | Over 5 minutes |
| Q9 Please provide any other feedback or suggestions to help us improve the mental health and well-being of our clients. |  | | |

**TMH Mid-Point feedback Office staff**

| **This survey is part of the Talking Mental Health project. We want to know how each of the new processes are working for you. Your answers will help us improve them.** | | | | | | | | | | | | | | | | | | | | | | | | | | | | |
| --- | --- | --- | --- | --- | --- | --- | --- | --- | --- | --- | --- | --- | --- | --- | --- | --- | --- | --- | --- | --- | --- | --- | --- | --- | --- | --- | --- | --- |
| Q1A Adding the QOL-ACC tool in all customer assessments is meant to ensure care plans include the QOL areas of social inclusion and well-being.  How do you think it is going? | It is easy to use (1) | | | | | Strongly agree (1) | | | | | Agree (2) | | | | | Neither agree nor disagree (3) | | | | | Disagree (4) | | | | | Strongly disagree (5) | | |
| It is improving client assessments (2) | | | | | Strongly agree (1) | | | | | Agree (2) | | | | | Neither agree nor disagree (3) | | | | | Disagree (4) | | | | | Strongly disagree (5) | | |
| It is improving client care plans (3) | | | | | Strongly agree (1) | | | | | Agree (2) | | | | | Neither agree nor disagree (3) | | | | | Disagree (4) | | | | | Strongly disagree (5) | | |
| Q1B Any other thoughts/ suggestions on improving the use of QOL-ACC tool in all customer assessments? | | | | | | | | | | | | | | | | | | | | | | | | | | | | |
| Q2A The new Client Check-in assessment is meant to provide a framework to check in with a client when a follow up is required.  How do you think it is going? | It is easy to use (1) | | | | Strongly agree (1) | | | | | Agree (2) | | | | | Neither agree nor disagree (3) | | | | | Disagree (4) | | | | | Strongly disagree (5) | | | |
| It is improving client assessments (2) | | | | Strongly agree (1) | | | | | Agree (2) | | | | | Neither agree nor disagree (3) | | | | | Disagree (4) | | | | | Strongly disagree (5) | | | |
| It is improving client care plans (3) | | | | Strongly agree (1) | | | | | Agree (2) | | | | | Neither agree nor disagree (3) | | | | | Disagree (4) | | | | | Strongly disagree (5) | | | |
| Any other thoughts or suggestions on improving the new Client Check-in assessment? | | | | | | | | | | | | | | | | | | | | | | | | | | | | |
| Q3A The new mental health and wellbeing section of the HCW task list prompt is meant to provide more information to the home care worker.  How do you think it is going? | It is easy to use (1) | | | Strongly agree (1) | | | | | Agree (2) | | | | | Neither agree nor disagree (3) | | | | | Disagree (4) | | | | | Strongly disagree (5) | | | | |
| I think it is valuable for home care workers (2) | | | Strongly agree (1) | | | | | Agree (2) | | | | | Neither agree nor disagree (3) | | | | | Disagree (4) | | | | | Strongly disagree (5) | | | | |
| Q3B Any other thoughts or suggestions on improving the HCW task list prompt? | | | | | | | | | | | | | | | | | | | | | | | | | | | | |
| Q4A The new supervisor requirements automatically create a follow up task from home care worker feedback. This is meant to ensure that when a home care worker notices a client need, the office is notified and can follow up in a timely manner.   We know that initially many requirements were created when there was no information added, and this issue is being addressed. | | | | | | | | | | | | | | | | | | | | | | | | | | | | |
| Other than that, how do you think this is going? | | It is easy to use (1) | | | | | | Strongly agree (1) | | | | | Agree (2) | | | | | Neither agree nor disagree (3) | | | | | Disagree (4) | | | | | Strongly disagree (5) |
| It is ensuring client follow up when this is required (2) | | | | | | Strongly agree (1) | | | | | Agree (2) | | | | | Neither agree nor disagree (3) | | | | | Disagree (4) | | | | | Strongly disagree (5) |
| It is improving client outcomes (3) | | | | | | Strongly agree (1) | | | | | Agree (2) | | | | | Neither agree nor disagree (3) | | | | | Disagree (4) | | | | | Strongly disagree (5) |
| Q4B Any other thoughts or suggestions for improvement on the new supervisor requirements follow up task? | | | | | | | | | | | | | | | | | | | | | | | | | | | | |
| 5A The text message template to respond to the new HCW Client Report is meant to close the loop for home care workers, so they know that their feedback has been received.  How do you think it is going? | | | It is easy to use (1) | | | | Strongly agree (1) | | | | | Agree (2) | | | | | Neither agree nor disagree (3) | | | | | Disagree (4) | | | | | Strongly disagree (5) | |
| It helps close the loop with home care workers (2) | | | | Strongly agree (1) | | | | | Agree (2) | | | | | Neither agree nor disagree (3) | | | | | Disagree (4) | | | | | Strongly disagree (5) | |
| Q5B Any other thoughts or suggestions for improvement on the new message template response to HCW Client report? | | | | | | | | | | | | | | | | | | | | | | | | | | | | |
| Q6A The elevation process provided in the Training Manual is meant to provide guidance if a client needs further assistance.  How do you think it is going? | | | It is easy to use (1) | | | | Strongly agree (1) | | | | | Agree (2) | | | | | Neither agree nor disagree (3) | | | | | Disagree (4) | | | | | Strongly disagree (5) | |
| It provides useful elevation guidance (2) | | | | Strongly agree (1) | | | | | Agree (2) | | | | | Neither agree nor disagree (3) | | | | | Disagree (4) | | | | | Strongly disagree (5) | |
| It is improving client outcomes (3) | | | | Strongly agree (1) | | | | | Agree (2) | | | | | Neither agree nor disagree (3) | | | | | Disagree (4) | | | | | Strongly disagree (5) | |
| Q6B Any other thoughts or suggestions for improvement to the elevation process? | | | | | | | | | | | | | | | | | | | | | | | | | | | | |
| Q7  Any other feedback or suggestions about Talking Mental Health so far? | | | | | | | | | | | | | | | | | | | | | | | | | | | | |

1. Jorm AF. Mental health literacy. American psychologist. 2012;67(3):231-43.

2. Wei Y, McGrath PJ, Hayden J, Kutcher S. Mental health literacy measures evaluating knowledge, attitudes and help-seeking: a scoping review. BMC Psychiatry. 2015;15(1).
