# Supplementary material for: Talking Mental Health in home care services for older people: implementation and process evaluation
Source: Research Square preprint supplement (doi:10.21203/rs.3.rs-6730629/v1), 2025-07-04
Supplement: Supplementary file 5 [file 9f7942bf53fd5717d3219774.docx]

## Supplementary File 2.

## Structured Query Language script to search for possible mental health concerns

| Search terms used to identify mental health indicators recorded in client files | | | | | |
| --- | --- | --- | --- | --- | --- |
| agitat | depress | emotion | mental | psych | unhapp |
| anxi | distr | isolat | mental health | sad | upset |
| cry | distress | lonel | mood | stress | worr |
| depr | emoti | lonely | overwhelm | teary |  |
